# Supplementary material for: High-rate-capability asymmetric supercapacitor device based on lily-like Co3O4nanostructures assembled using nanowires
Source: Royal Society of Chemistry journal article supplement (doi:10.1039/c6ra27356d), 2017-01-01
Supplement: c6ra27356d1.pdf [file c6ra27356d1.pdf]

*Supplementary Information*

**High-Rate-Capability Asymmetric Supercapacitor Device Based on  
Lily-like Co<sub>3</sub>O<sub>4</sub> Nanostructures Assembled by Nanowires**

Yanjie Wang<sup>a</sup>, Shaobo Huang<sup>a</sup>, Yin Lu<sup>a</sup>, Shizhong Cui<sup>a</sup>, Weihua Chen<sup>\*, b</sup> and  
Liwei Mi<sup>\*, a</sup>

<sup>a</sup>Center for Advanced Materials Research, Zhongyuan University of Technology, Zhengzhou, Henan 450007, China. Email: mlwzzu@163.com

<sup>b</sup>College of Chemistry and Molecular Engineering, Zhengzhou University, Zhengzhou, Henan, 450001, China. E-mail: chenweih@zzu.edu.cn

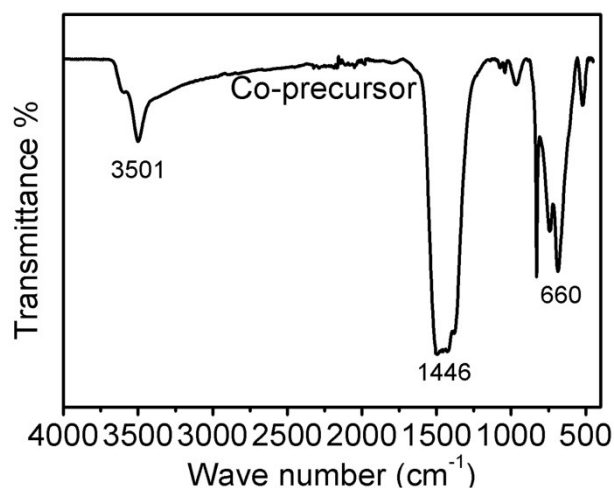

**Fig. S1.** The FT-IR spectrum of Co-precursor. The IR peaks around  $3501\text{ cm}^{-1}$  is proposed to be attributed to stretching vibration of OH group. The peaks at  $1446\text{ cm}^{-1}$  are ascribed to C-O group. In addition, the peak at  $660\text{ cm}^{-1}$  can be assigned to the vibration of Co-O group. Therefore, the Co-precursor is proposed as the complex including cobalt and organic compounds.

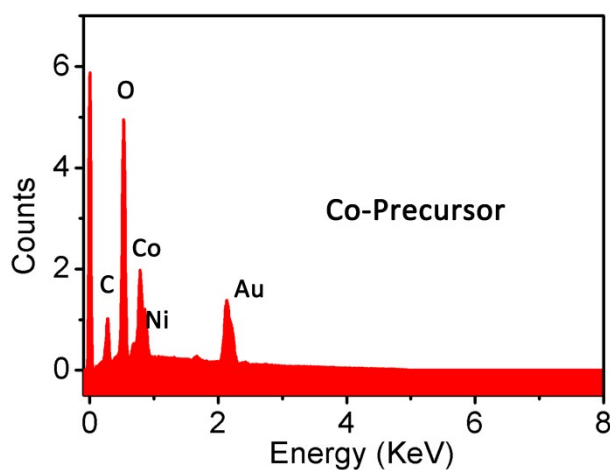

**Fig. S2.** The energy dispersive spectrum (EDS) analysis of Co-precursor. Known from EDS result, the elements of C, O, Co were observed. Note: Ni signal peak was from Ni foam, Au signal peak was from metal spraying process.

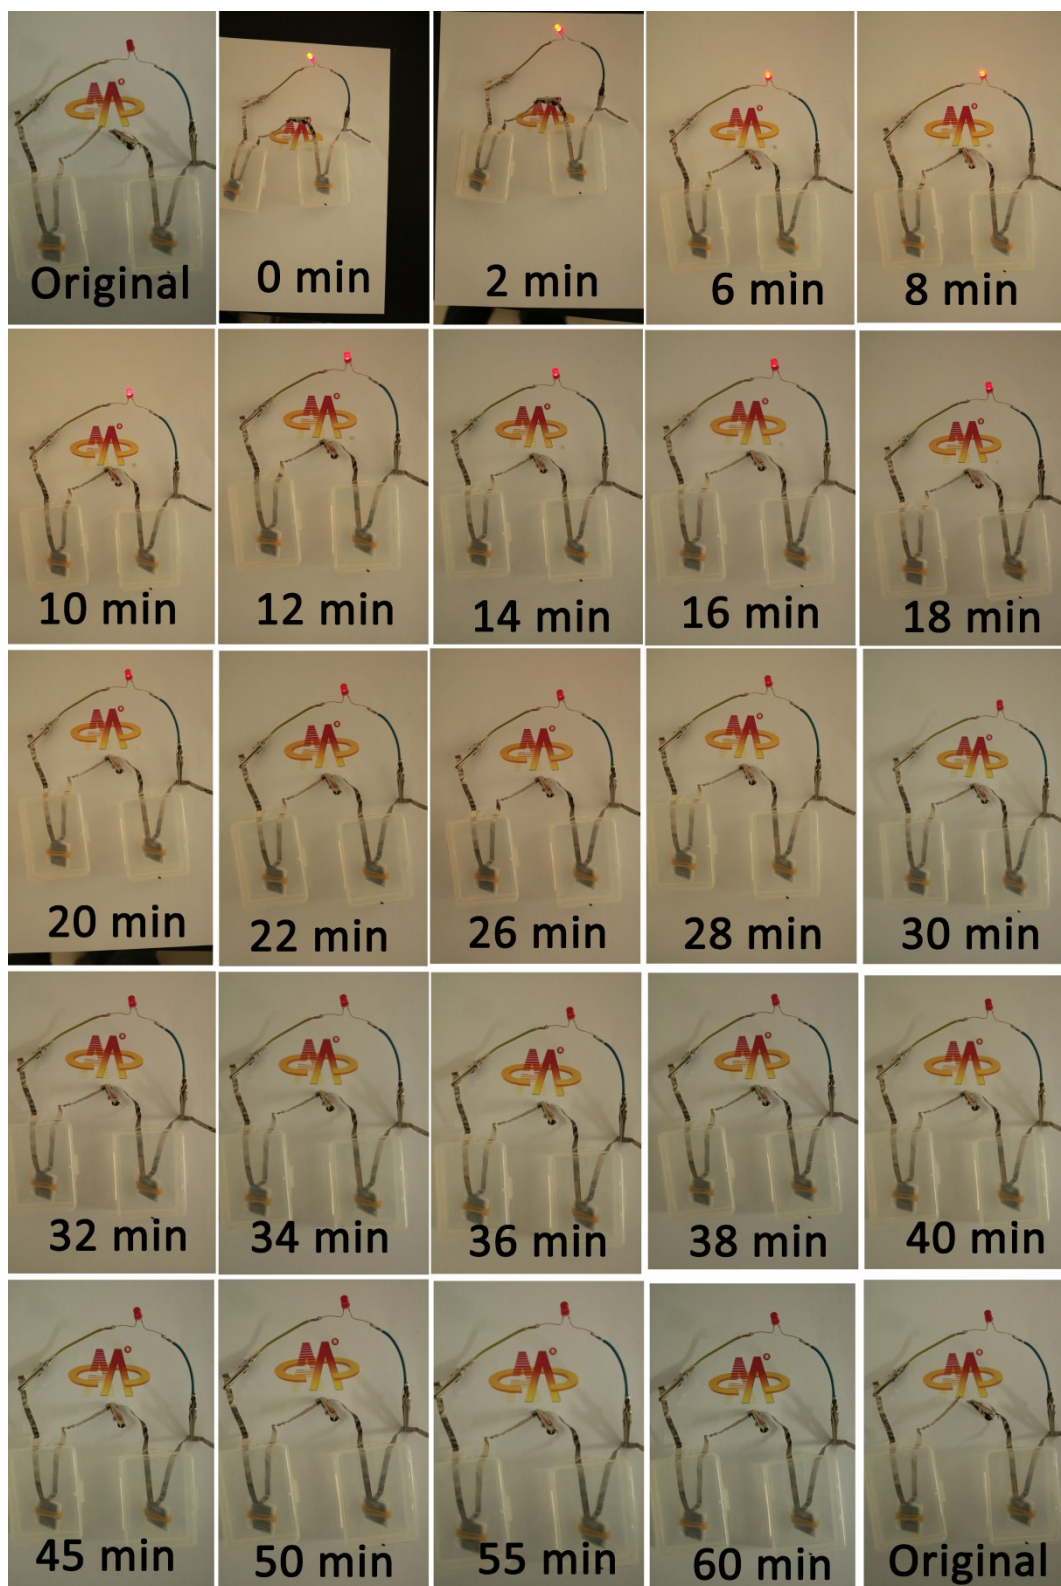

Fig. S3. The LED lighted by two supercapacitors in series at different time.
